# Supplementary material for: Molecular Identification and Selection of Probiotic Strains Able to Reduce the Serum TMAO Level in Mice Challenged with Choline
Source: MDPI journal article supplement (doi:10.3390/foods10122931), 2021-11-27
Supplement: s1 [file s1]

**Table S1.** Genomic characteristics of *Lactobacillus plantarum* strains.

| Strain no.             | Source                         | Accession no.   | Genome size (bp) | G+C content (%) | No. of contigs | No. of CDS |
|------------------------|--------------------------------|-----------------|------------------|-----------------|----------------|------------|
| 10CH                   | Cheese                         | GCA_002005385.2 | 3,311,056        | 44.5            | 1              | 3,079      |
| AS-10                  | Fruits and vegetables          | GCA_003045645.1 | 3,022,969        | 44.8            | 1              | 2,853      |
| ATCC 15578             | Brewery                        | GCA_002900075.1 | 3,473,609        | 44.1            | 27             | 3,319      |
| ATCC 202195            | Human                          | GCA_004354995.1 | 3,327,225        | 44.3            | 20             | 3,139      |
| ATCC 8014              | —                              | GCA_002749655.1 | 3,309,473        | 44.5            | 5              | 3,109      |
| ATG-K8                 | Kimchi                         | GCA_003597615.1 | 3,275,764        | 44.5            | 2              | 3,066      |
| BLS41                  | Kimchi                         | GCA_002116955.1 | 3,476,011        | 44.2            | 6              | 3,289      |
| b-2                    | Pickle                         | GCA_003352125.1 | 3,211,268        | 44.8            | 1              | 3,039      |
| CCFM605                | Yogurt-like dairy product      | GCA_003344825.1 | 3,314,628        | 44.4            | 55             | 3,167      |
| CGMCC 1.557            | —                              | GCA_001272315.2 | 3,273,239        | 44.4            | 3              | 3,104      |
| CGMCC 12436            | Yogurt-like dairy product      | GCA_003344845.1 | 3,259,936        | 44.5            | 53             | 3,046      |
| CIP 104448             | Human stool                    | GCA_000956195.1 | 3,237,330        | 44.4            | 178            | 3,043      |
| CECT 8962              | —                              | GCA_900289155.1 | 3,290,117        | 44.3            | 136            | 3,106      |
| CECT 8963              | —                              | GCA_900290135.1 | 3,248,428        | 44.4            | 136            | 3,062      |
| CECT 8964              | —                              | GCA_900290105.1 | 3,247,322        | 44.4            | 173            | 3,033      |
| CECT 8965              | —                              | GCA_900290125.1 | 3,342,151        | 44.3            | 152            | 3,144      |
| CECT 8966              | —                              | GCA_900290085.1 | 3,295,692        | 44.3            | 161            | 3,093      |
| CECT 9492              | Chenopodium quinoa seeds       | GCA_900695295.1 | 3,343,723        | 44.2            | 63             | 3,153      |
| DS11_9                 | Commercial dietary supplements | GCA_003061805.1 | 3,208,332        | 44.5            | 25             | 2,998      |
| DS13_9                 | Commercial dietary supplements | GCA_003053185.1 | 3,112,570        | 44.7            | 32             | 2,913      |
| DS23_9                 | Commercial dietary supplements | GCA_003053045.1 | 3,204,801        | 44.5            | 38             | 3,991      |
| DS3_9                  | Commercial dietary supplements | GCA_003053165.1 | 3,231,607        | 44.5            | 36             | 3,027      |
| DS6_9                  | Commercial dietary supplements | GCA_003061725.1 | 3,215,836        | 44.5            | 71             | 3,001      |
| DS8_9                  | Commercial dietary supplements | GCA_003053025.1 | 3,113,711        | 44.7            | 27             | 2,910      |
| DSM 20174 <sup>T</sup> | Pickled cabbage                | NZ_CP039121.1   | 3,250,154        | 44.5            | 2              | 3,032      |
| FBL-3a                 | Beef cattle                    | GCA_003999275.1 | 3,232,240        | 44.6            | 1              | 3,045      |
| HFC8                   | Faecal                         | GCA_001302645.1 | 3,405,709        | 44.3            | 11             | 3,370      |
| IDCC3501               | Kimchi                         | GCA_003428355.1 | 3,242,652        | 44.5            | 1              | 3,022      |
| JBE245                 | Meju                           | GCA_001596095.1 | 3,262,611        | 44.5            | 1              | 3,056      |
| JDM1                   | —                              | GCA_000023085.1 | 3,197,759        | 44.7            | 1              | 2,985      |
| KACC 92189             | —                              | GCA_003692595.1 | 3,460,294        | 44.3            | 5              | 3,270      |
| KC28                   | Kimchi                         | GCA_002948215.1 | 3,291,849        | 44.5            | 1              | 3,118      |
| K259                   | Kimchi                         | GCA_002868775.1 | 3,373,076        | 44.5            | 2              | 3,175      |
| LM1004                 | Kimchi                         | GCA_002895245.1 | 3,198,690        | 44.6            | 1              | 3,006      |
| LMG S 29189            | —                              | GCA_002914965.1 | 3,200,023        | 44.5            | 19             | 2,996      |
| LP1145                 | Fermented vegetables           | This study      | 3,250,380        | 44.5            | 2              | 3,032      |
| LP2                    | Pickles                        | GCA_002109425.1 | 3,284,622        | 44.5            | 1              | 3,082      |
| LP3                    | Commercial dietary supplements | GCA_002286275.1 | 3,329,954        | 44.4            | 3              | 3,103      |
| LPL-1                  | Fermented fish                 | GCA_002205775.2 | 3,200,572        | 44.6            | 2              | 3,006      |
| LY-78                  | Fermented chinese cabbage      | GCA_001715615.1 | 3,128,783        | 44.6            | 2              | 2,926      |
| LZ95                   | Baby stool                     | GCA_001484005.1 | 3,322,458        | 44.5            | 3              | 3,126      |
| NCIMB 700965           | Cheese                         | GCA_003611015.1 | 3,216,285        | 44.5            | 6              | 3,207      |
| PC520                  | Chinese fermented food-pickles | GCA_002576835.1 | 3,452,904        | 44.3            | 3              | 3,286      |
| PS128                  | Fu-tsai                        | GCA_001005805.1 | 3,325,806        | 44.6            | 11             | 3,087      |
| Q7                     | Yak fermented milk             | GCA_003999605.1 | 2,981,934        | 44.6            | 5              | 2,809      |
| SK151                  | Kimchi                         | GCA_003269405.1 | 3,231,249        | 44.6            | 1              | 2,997      |
| TMW 1.1478             | Honey                          | GCA_003345375.1 | 3,387,168        | 44.3            | 2              | 3,198      |

|         |                              |                 |           |      |   |       |
|---------|------------------------------|-----------------|-----------|------|---|-------|
| TS12    | Stinky Tofu                  | GCA 001908455.1 | 3,433,628 | 44.3 | 7 | 3,379 |
| UNQLp11 | Pinot noir wine              | GCA 004730965.1 | 3,534,932 | 44.2 | 1 | 3,413 |
| ZJ316   | Healthy newborn fecal sample | GCA 000338115.2 | 3,299,755 | 44.5 | 4 | 3,138 |
| ZS2058  | sauerkraut                   | GCA 001296095.1 | 3,198,337 | 44.7 | 1 | 2,958 |
| 5-2     | Fermented soybean            | GCA 001278015.1 | 3,237,652 | 44.7 | 1 | 3,034 |

**Table S2.** Discriminated loci between *Lactobacillus plantarum* LP1145 and DSM 20174<sup>T</sup>.

| Locus no. | Gene   | Annotation                                      | Length (bp) | Position (SNP)                                                                                                                                                 | Insertion/Deletion (nucleotide sequence) |
|-----------|--------|-------------------------------------------------|-------------|----------------------------------------------------------------------------------------------------------------------------------------------------------------|------------------------------------------|
| —         | —      | IS1182 family transposase*                      | 1655        | 11(G/A), 87(C/A), 1473(A/T), 1477(T/C), 1590(G/A), 1597(C/A), 1621(G/A)                                                                                        | Ins (C)                                  |
| 2         | —      | major facilitator superfamily transporter       | 1455        | 278(C/T)                                                                                                                                                       |                                          |
| 3         | —      | IS1182 family transposase*                      | 1851        | 478(A/G)                                                                                                                                                       |                                          |
| 4         | —      | sigma-54-dependent transcriptional regulator    | 2850        | 2444(A/C)                                                                                                                                                      |                                          |
| 5         | —      | IS1182 family transposase*                      | 1701        | 224(G/A), 498(C/T), 982(A/G), 1196(G/A), 1309(A/G)                                                                                                             |                                          |
| 6         | guaA   | Glutamine -hydrolyzing GMP synthase             | 1557        | 889(T/G)                                                                                                                                                       |                                          |
| —         | —      | MarR family transcriptional regulator           | 477         | 264(T/G)                                                                                                                                                       |                                          |
| 7         | —      | Cna B-type domain-containing protein            | 2958        |                                                                                                                                                                | Del (TGCTACTGCTAC)                       |
| 8         | ccpA_2 | Catabolite control protein A                    | 1011        | 954(A/C)                                                                                                                                                       |                                          |
| 9         | —      | NAD(P)/FAD-dependent oxidoreductase             | 1203        | 805(C/A)                                                                                                                                                       |                                          |
| 10        | —      | gamma-D-glutamyl-meso-diaminopimelate peptidase | 789         | 339(T/C)                                                                                                                                                       |                                          |
| 11        | —      | DUF5011 domain-containing protein               | 3347        | 218(C/T), 290(T/C), 314(T/C), 401(T/C), 425(C/T), 2340(G/A), 2488(A/G), 2492(T/C), 2559(T/C), 2590(G/A), 2690(T/C), 2728(A/G), 2820(A/G), 3311(C/T), 3312(A/C) | Del (AACCAGTAGTG-CAGCGAACAGTGT)          |

\*multicopy gene.
